# Supplementary material
Source: Springer Nature journal article supplement (https://www.springermedizin.de/resource/supplementary/13046_2010_444_MOESM1_ESM.pdf/9662246)

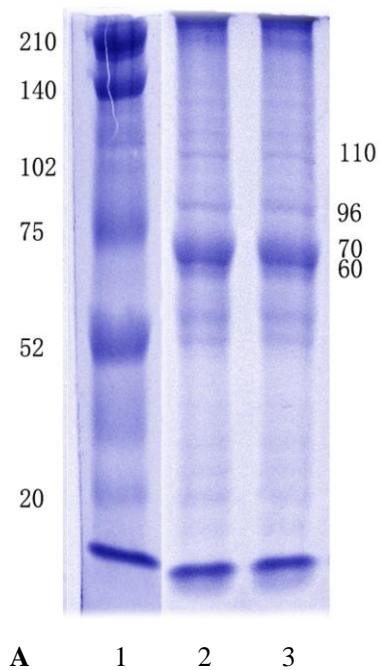

**A** 1 2 3

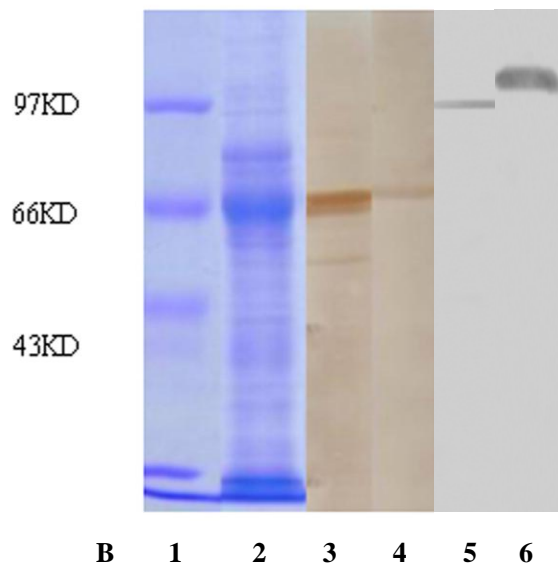

**B** 1 2 3 4 5 6

Supplement: MOESM1 [file 9662246]
